# Supplementary material
Source: MDPI journal article supplement (https://www.mdpi.com/2075-163X/12/7/899)
Supplement: s1 [file s1]

Archive with 9 entries (9 files):
- Supplementary Figure captions.pdf
- Supplementary Figure S1.pdf
- Supplementary Figure S2.pdf
- Supplementary Figure S3.pdf
- Supplementary Figure S4.pdf
- Supplementary Figure S5.pdf
- Supplementary Figure S6.pdf
- Supplementary Figure S7.pdf
- Supplementary Tables S1 and S2.xlsx
