# Supplementary material
Source: MDPI journal article supplement (https://www.mdpi.com/2075-163X/12/7/899)
Supplement: s1 [file s1 › Supplementary Tables S1 and S2.xlsx]

## Sheet: Table S1
Table S1. LA-MC-ICPMS calcite U-Pb dating results of the Xikuangshan Sb deposit.
Stage	Sample	238U/206Pb	238U/206Pb_Int2SE	207Pb/206Pb	207U/206Pb_Int2SE	Approx_U_ppb	Approx_Pb_ppb	U/Pb
	DCW-2	0.09901	0.012744	0.8654	0.0097	50	707	0.0707214
		0.09901	0.010783	0.875	0.011	42.7	684	0.0624269
		0.09901	0.018626	0.869	0.015	74	930	0.0795699
		0.106383	0.012449	0.865	0.011	49.2	743	0.066218
		0.110375	0.012183	0.86	0.015	48	713	0.0673212
		0.119904	0.010927	0.8795	0.0094	31.3	752	0.0416223
		0.145138	0.013482	0.8813	0.0093	34.5	689	0.0500726
		0.166667	0.030556	0.848	0.018	79	534	0.14794
		0.166945	0.02369	0.8756	0.01	71	624	0.113782
		0.184502	0.026212	0.861	0.016	75	619	0.121163
		0.189753	0.032766	0.857	0.019	86	590	0.145763
		4.78469	0.686798	0.801	0.017	307.9	246	1.25163
		7.35294	1.7301	0.711	0.057	108	14.5	7.44828
		7.63942	0.548591	0.801	0.019	302.4	155	1.95097
		10	2.3	0.704	0.039	166	27.9	5.94982
		12.1212	0.764004	0.755	0.021	311.6	97.1	3.20906
		12.3457	1.98141	0.758	0.056	77.1	12.17	6.33525
		15.625	1.7334	0.698	0.03	205.1	48.8	4.20287
		25.1889	1.90345	0.676	0.046	151	17.19	8.78418
		26.2467	1.79112	0.695	0.039	157.3	20.1	7.82587
		28.0112	2.66773	0.613	0.041	314.4	39.3	8
		31.5457	3.58248	0.562	0.039	223.9	23.1	9.69264
		34.3643	4.01507	0.574	0.032	314.1	29.8	10.5403
		34.7222	1.92901	0.59	0.035	221.4	20.3	10.9064
		35.5872	3.16612	0.599	0.038	223.8	19.9	11.2462
		36.7647	5.81207	0.499	0.05	206.5	18.4	11.2228
		36.7647	3.51427	0.568	0.041	234.5	18.3	12.8142
		37.3134	2.3669	0.62	0.039	215.6	17.59	12.257
		38.0228	1.87946	0.617	0.036	187	16.16	11.5718
		38.3142	2.34876	0.575	0.035	196	15.5	12.6452
		38.4615	1.92308	0.579	0.032	300.9	23.6	12.75
		38.61	2.98147	0.578	0.037	289.6	25.2	11.4921
		39.3701	10.85	0.492	0.059	166.4	13.5	12.3259
		39.3701	1.86	0.598	0.035	215.7	17.23	12.5189
		42.6076	1.81541	0.574	0.035	278.9	19.02	14.6635
		46.4684	2.13772	0.56	0.036	250.8	16.02	15.6554
		46.9484	3.74705	0.551	0.056	199.6	12.1	16.4959
		47.1698	2.44749	0.539	0.038	238.7	15.04	15.871
		47.8469	6.86798	0.399	0.052	209.6	12.9	16.2481
		48.6618	2.17853	0.534	0.035	237.7	14.35	16.5645
		48.7805	3.0934	0.53	0.044	220.7	14	15.7643
		50.2513	4.54534	0.447	0.047	210.4	12	17.5333
		50.2513	3.78778	0.474	0.044	206.4	11.7	17.641
		51.5464	6.64258	0.339	0.052	309.2	17.9	17.2737
		52.6316	3.3241	0.514	0.044	195.6	10.89	17.9614
		53.4759	2.85968	0.502	0.039	203.7	10.62	19.1808
		53.4759	4.00355	0.484	0.041	210.2	11.4	18.4386
		54.054	3.50621	0.461	0.037	220.1	10.95	20.1005
		54.9451	4.52844	0.526	0.065	206.8	13.1	15.7863
		56.1798	5.99672	0.41	0.046	231.3	12.5	18.504
		60.4961	3.36699	0.436	0.038	187.9	8.14	23.0835
		60.6061	4.40771	0.438	0.042	227.5	10.37	21.9383
		61.7284	3.8104	0.47	0.041	230.5	10.15	22.7094
		61.7284	7.62079	0.368	0.038	325.7	14.1	23.0993
		62.0347	3.61741	0.439	0.038	203.4	8.6	23.6512
		62.1118	6.94418	0.367	0.042	286	10.11	28.2888
		62.7353	3.69957	0.389	0.042	199.9	7.9	25.3038
		63.6943	6.89683	0.325	0.048	192.4	7.9	24.3544
		63.6943	4.46266	0.434	0.04	285	11.7	24.359
		64.7249	4.02174	0.459	0.038	219.9	9.19	23.9282
		65.7895	6.49238	0.321	0.043	351.5	14.3	24.5804
		68.5871	3.95152	0.426	0.037	226.2	9.28	24.375
		69.0608	4.38784	0.414	0.039	191.4	7.15	26.7692
		69.4444	6.26929	0.301	0.042	192.7	6.58	29.2857
		70.1262	4.77016	0.416	0.033	195.3	6.93	28.1818
		72.8332	4.77421	0.369	0.047	206.5	6.67	30.9595
		76.2195	4.0085	0.357	0.033	308.1	9.89	31.1527
		76.9823	5.09659	0.351	0.039	210.1	6.72	31.2649
		77.5194	5.34824	0.341	0.04	219.8	6.97	31.5352
		77.7605	5.62343	0.305	0.04	191.3	5.31	36.0264
		77.7605	5.13969	0.324	0.039	215.5	5.99	35.9766
		78.1861	4.89045	0.342	0.076	189.5	5.51	34.392
		78.7402	7.44001	0.295	0.039	235.5	6.76	34.8373
		79.1766	4.82707	0.323	0.034	204.6	5.81	35.2151
		79.3651	7.55858	0.219	0.037	327.3	9.1	35.967
		80.5153	6.02892	0.292	0.034	255.8	7.23	35.3804
		81.4332	5.90192	0.294	0.038	265.5	7.84	33.8648
		81.5661	5.92119	0.375	0.078	161.1	4.56	35.3289
		81.9672	5.44208	0.398	0.064	201.2	5.86	34.3345
		81.9672	6.71862	0.333	0.086	214.4	6	35.7333
		82.6446	5.73731	0.282	0.038	234.1	6.43	36.4075
		83.3333	7.63889	0.281	0.048	184.1	4.44	41.464
		84.1043	4.45632	0.235	0.027	267	6.62	40.3323
		84.7458	7.18184	0.285	0.038	213.1	5.7	37.386
		85.3242	5.53297	0.309	0.036	231.9	5.92	39.1723
		86.1326	6.15763	0.261	0.039	187.3	4.59	40.8061
		86.6551	6.15747	0.304	0.04	199.5	5.35	37.2897
		86.7303	5.2655	0.273	0.046	217.7	5.47	39.7989
		87.4126	5.19585	0.234	0.029	260.9	5.84	44.6747
		87.4891	6.8889	0.255	0.04	189.5	4.43	42.7765
		88.1834	6.22105	0.197	0.035	198	4.27	46.37
		88.1834	6.76539	0.244	0.042	191.3	4.54	42.1366
		90.2527	5.53897	0.22	0.031	238	5.3	44.9057
		90.9918	7.03758	0.215	0.029	199	4.41	45.1247
		92.081	8.39413	0.198	0.043	212	3.64	58.2418
		92.3361	6.22395	0.183	0.032	206.1	4.06	50.7635
		92.5069	5.39125	0.218	0.025	297.1	6.64	44.744
		92.5069	5.9047	0.21	0.042	192.3	4.19	45.895
		93.633	5.69864	0.178	0.021	252.3	4.96	50.8669
		94.7867	6.82824	0.18	0.031	198.8	3.79	52.4538
		95.057	5.96365	0.169	0.022	196	3.74	52.4064
		95.3289	6.54307	0.146	0.026	200.4	3.93	50.9924
		95.511	7.3891	0.164	0.032	210.7	4.01	52.5436
		95.9693	5.89447	0.188	0.028	306.4	5.99	51.1519
		96.0615	7.01313	0.189	0.029	196.8	3.8	51.7895
		96.1539	5.54734	0.158	0.024	279.8	5.46	51.2454
		96.7118	7.38901	0.17	0.03	191.3	3.43	55.7726
		96.8054	5.62277	0.215	0.024	324.6	6.55	49.5573
		96.8992	6.9482	0.187	0.047	192.3	3.65	52.6849
		98.5222	6.79463	0.158	0.028	287.5	5.47	52.5594
		98.7167	6.43169	0.157	0.031	222.9	3.83	58.1984
		99.0099	5.68572	0.132	0.033	298.4	5.3	56.3019
		100.705	5.78065	0.186	0.023	316.3	5.91	53.5195
		103.627	5.69143	0.137	0.017	390	6.67	58.4708
		104.384	5.99283	0.127	0.036	315.7	5.62	56.1744
		105.042	5.95827	0.117	0.017	307.8	4.93	62.4341
		108.696	6.7344	0.123	0.016	297.7	4.7	63.3404
		110.62	6.85253	0.111	0.017	288.2	4.6	62.6522
	27-41(area 1)	0.60241	0.101611	0.843	0.015	184.6	1170	0.157778
		0.904977	0.0647	0.854	0.011	165.1	726	0.22741
		1.1062	0.119919	0.843	0.016	159.9	580	0.27569
		1.21951	0.208209	0.821	0.013	152.3	501	0.303992
		1.21951	0.252826	0.836	0.016	232.3	680	0.341618
		1.28205	0.180802	0.836	0.015	172	551	0.31216
		1.97239	0.136161	0.847	0.012	230.3	461	0.499566
		2.00803	0.217738	0.827	0.013	229.1	441	0.519501
		2.7933	0.296495	0.836	0.014	274.4	391	0.70179
		2.92398	0.265039	0.821	0.014	288.4	374	0.771123
		3.16456	0.240346	0.839	0.012	238.7	303	0.787789
		3.20513	0.400641	0.82	0.024	141.7	174	0.814368
		3.26797	0.30971	0.83	0.012	257.7	306	0.842157
		3.46021	0.610625	0.782	0.033	170.3	202	0.843069
		4	1.76	0.751	0.036	249.2	270	0.922963
		4.13223	0.392733	0.8	0.016	230.6	217	1.06267
		4.38596	0.596337	0.814	0.022	191.8	172	1.11512
		5.49451	0.72455	0.82	0.024	247.5	177	1.39831
		6.57895	0.908934	0.801	0.026	213.4	121	1.76364
		6.66223	0.399467	0.829	0.022	180.2	103.8	1.73603
		7.8125	0.854492	0.791	0.026	164.7	78	2.11154
		8.47458	1.36455	0.766	0.034	190.4	93	2.04731
		8.54701	2.5568	0.749	0.091	103.7	59	1.75763
		11.4942	2.37812	0.791	0.042	259.1	92	2.8163
		12.7714	0.848164	0.741	0.026	225.4	67.7	3.32939
		13.6986	2.62713	0.778	0.057	204	60	3.4
		13.8889	1.92901	0.685	0.06	174.2	49.7	3.50503
		13.8889	2.89352	0.729	0.047	239.2	66	3.62424
		15.873	3.27538	0.759	0.051	273.3	71	3.8493
		17.094	2.74673	0.681	0.035	190.1	41.9	4.53699
		18.315	1.77783	0.752	0.044	152.4	32.1	4.74766
		18.4502	1.66801	0.732	0.032	227.5	46.4	4.90302
		18.8679	4.27198	0.672	0.057	162.6	33.4	4.86826
		20	4.8	0.694	0.051	156.5	27.7	5.64982
		20.7469	3.8739	0.7	0.05	122.5	22.4	5.46875
		21.322	2.09128	0.751	0.046	196.3	33.8	5.80769
		21.7865	2.84791	0.712	0.05	168.8	29.9	5.64548
		25	7.5	0.636	0.054	172.5	27.4	6.29562
		25.1256	4.10343	0.699	0.058	162.9	26.8	6.07836
		27.3224	4.40443	0.722	0.092	150.5	20.5	7.34146
		27.6243	4.34968	0.671	0.059	169.3	22.5	7.52444
		38.7597	8.56319	0.611	0.051	339.7	32.3	10.517
		45.2489	9.62306	0.624	0.05	257.8	18.3	14.0874
		45.4545	11.5702	0.553	0.056	285.3	23.8	11.9874
		53.1915	10.4685	0.5	0.1	167.5	11.7	14.3162
		55.2486	8.24151	0.541	0.067	212.5	12.3	17.2764
		59.8802	11.8326	0.49	0.056	430.1	24.8	17.3427
		61.3497	6.39843	0.528	0.046	302.3	15.4	19.6299
		66.6667	7.55556	0.451	0.051	197.4	8.9	22.1798
		62.5	7.8125	0.512	0.049	435.7	21.8	19.9862
	27-41(area 2)	12.8205	1.80802	0.732	0.046	209.2	64.4	3.24845
		23.9234	3.14782	0.646	0.045	245.6	38.6	6.36269
		42.735	5.29622	0.638	0.049	257	21	12.2381
		0.694444	0.053048	0.8519	0.0077	199.4	1120	0.178036
		15.873	3.52734	0.692	0.044	308.9	77	4.01169
		62.5	11.3281	0.44	0.041	311.6	16.6	18.7711
		36.7647	6.62305	0.653	0.059	300	31.4	9.55414
		63.6943	10.5481	0.469	0.064	202.7	10.4	19.4904
		10.8933	1.17476	0.754	0.032	243.2	91	2.67253
		53.4759	6.86322	0.544	0.076	270.9	16.9	16.0296
		27.1739	4.94742	0.71	0.052	221.8	32.5	6.82462
		8.40336	0.776781	0.81	0.023	255.3	119	2.14538
		0.406669	0.0129	0.8425	0.0089	214	2095	0.102148
		3.67647	0.256812	0.838	0.018	241.3	257	0.938911
		16.6667	1.44444	0.777	0.029	282.7	62.9	4.49444
		3.3557	0.427909	0.827	0.018	204.5	239	0.855649
		0.877193	0.13081	0.8421	0.0093	224.7	970	0.231649
		21.8818	2.48984	0.754	0.04	267.7	47.6	5.62395
		25.3807	5.66879	0.661	0.048	230.8	31.3	7.3738
		2.92398	0.290688	0.826	0.014	212	283	0.749117
		8.13008	1.05757	0.805	0.027	210.4	97	2.16907
		51.5464	5.84547	0.61	0.054	189.6	12.2	15.541
		31.4465	7.21886	0.625	0.046	227.1	26.3	8.63498
		7.5188	1.24371	0.781	0.025	247	125	1.976
		2.26244	0.061424	0.848	0.011	306.3	533	0.574672
		29.1545	4.84492	0.671	0.043	270	36.3	7.43802
		9.61538	1.38683	0.758	0.037	223.6	92	2.43043
		1.84162	0.081398	0.8535	0.0089	337.3	714	0.472409
		42.9184	4.42079	0.64	0.037	359.5	29.3	12.2696
		7.93651	1.25976	0.756	0.03	324	153	2.11765
		28.6533	2.87354	0.693	0.047	243	30.5	7.96721
		1.52672	0.16083	0.851	0.015	340.2	930	0.365806
		11.9904	1.26517	0.754	0.019	472.9	140	3.37786
		10.6383	1.24491	0.763	0.039	281.7	102	2.76176
		12.6582	2.083	0.755	0.04	281	86	3.26744
		9.34579	1.92156	0.787	0.025	410	178	2.30337
		1.16279	0.189292	0.837	0.013	431.8	1470	0.293741
		1	0.12	0.842	0.022	444.1	1690	0.262781
		35.3357	4.74472	0.664	0.037	406.7	44.3	9.18059
		23.8095	2.72109	0.711	0.03	515	83	6.20482
	37-27	0.367647	0.052714	0.802	0.018	116.9	1220	0.0958197
		0.934579	0.192157	0.838	0.026	54	241	0.224066
		2.04082	0.832986	0.838	0.027	106.9	139	0.769065
		2.849	0.300322	0.876	0.029	58.4	81.4	0.717445
		3.31126	0.427613	0.837	0.025	80.1	102	0.785294
		3.3557	0.731949	1.03	0.15	10.5	8.2	1.28049
		3.52113	0.917477	0.782	0.024	272.4	277	0.983394
		3.63636	0.476033	0.813	0.029	97.7	105	0.930476
		4.21941	0.872367	0.92	0.098	15.37	14.9	1.03154
		6.71592	0.329256	0.831	0.049	57.8	33.2	1.74096
		6.89655	1.9025	0.73	0.16	52.6	41	1.28293
		7.46269	1.61506	0.8	0.1	83.4	42.9	1.94406
		9.17431	3.61922	0.73	0.075	65.5	26	2.51923
		10.101	1.12233	0.709	0.044	141	53.1	2.65537
		10.2564	0.86259	0.928	0.089	19.4	7.19	2.69819
		11.1111	1.48148	0.903	0.087	34.7	10.1	3.43564
		11.4025	0.962127	0.794	0.046	74.1	23.6	3.13983
		12.0482	0.783858	0.84	0.043	90.3	30	3.01
		12.3457	3.65798	0.729	0.085	161.4	44	3.66818
		12.9032	0.815817	0.793	0.039	70.6	21.2	3.33019
		12.9534	1.51011	0.82	0.076	54.2	16.3	3.32515
		14.3885	1.90466	0.791	0.049	68	17.1	3.97661
		15.2905	1.8704	0.734	0.029	206.3	47.4	4.35232
		15.8479	2.08458	0.702	0.03	537.4	124	4.33387
		16.129	3.12175	0.73	0.092	96.3	21.9	4.39726
		17.5439	5.84795	0.74	0.15	43.91	9.3	4.72151
		18.797	3.00328	0.697	0.085	73	15.1	4.83444
		19.5312	2.21252	0.7	0.1	77	12.4	6.20968
		19.802	1.84296	0.736	0.033	157.6	29.2	5.39726
		24.7525	4.16626	0.616	0.031	509	80	6.3625
		26.5252	1.82932	0.68	0.024	462	58.8	7.85714
		27.3224	4.25513	0.78	0.13	93.7	12.4	7.55645
		27.3973	3.0775	0.734	0.057	78.8	10.8	7.2963
		27.3973	7.20585	0.726	0.098	49.74	7.3	6.8137
		27.4725	2.94348	0.655	0.053	92.2	11.3	8.15929
		28.4091	3.55114	0.7	0.22	20.91	2.89	7.23529
		32.2581	2.39334	0.649	0.027	363.2	38.6	9.40933
		35.5872	5.44573	0.556	0.052	174.4	17.8	9.79775
		37.594	4.38125	0.702	0.095	50.1	4.25	11.7882
		42.735	8.58353	0.624	0.089	82.5	6.9	11.9565
		46.2963	3.00069	0.622	0.042	180	12.61	14.2744
		52.6316	5.26316	0.644	0.054	122.7	7.96	15.4146
		54.054	4.09058	0.516	0.049	124.2	6.83	18.1845
		58.4795	4.10383	0.519	0.047	239.3	13.8	17.3406
		59.1716	6.3023	0.407	0.034	591.9	30.1	19.6645
		61.7284	6.85871	0.432	0.046	211.8	9.7	21.8351
		62.8931	10.2844	0.467	0.077	116.1	7.2	16.125
		69.9301	9.78043	0.464	0.092	89.2	3.08	28.961
		72.1501	3.38366	0.361	0.027	576.1	21.9	26.3059
		74.184	3.90732	0.41	0.027	492	18.7	26.3102
		74.3494	5.52784	0.334	0.05	150.9	4.72	31.9703
		74.3494	3.75893	0.402	0.032	410.9	17.7	23.2147
		75.188	12.4371	0.267	0.049	166.8	5.9	28.2712
		77.6398	4.58123	0.307	0.03	556.7	20.6	27.0243
		78.7402	17.36	0.227	0.042	290.6	9.3	31.2473
		88.6525	7.78067	0.221	0.035	558.8	15.9	35.1447
		88.8889	6.32099	0.29	0.039	172.8	4.82	35.8506
		90.5797	6.72784	0.291	0.06	322.5	10.22	31.5558
		91.9963	8.04016	0.204	0.03	334.9	8.8	38.0568
		93.5454	8.75074	0.373	0.074	243	6.06	40.099
		95.2381	13.6054	0.126	0.031	501.5	12.5	40.12
		101.626	4.44097	0.197	0.017	625	14.8	42.2297
		102.775	6.65449	0.186	0.023	425.8	9.65	44.1244
		105.374	5.55185	0.209	0.02	490	10.05	48.7562
		105.708	9.38636	0.331	0.061	125.9	3.1	40.6129
		107.759	4.99313	0.169	0.017	636.6	13.28	47.9367
		114.416	8.37832	0.169	0.027	219.3	4.4	49.8409
		115.207	4.64546	0.125	0.012	732.5	14.2	51.5845
		122.85	6.03686	0.103	0.013	500.8	8.08	61.9802
		124.844	7.16957	0.066	0.013	333.2	5.17	64.4487
		127.388	6.97797	0.095	0.016	348.6	5.21	66.9098
		129.87	9.27644	0.134	0.024	271.4	4.48	60.5804

## Sheet: Table S2
Table S2. LA-MC-ICPMS in situ U-Pb data for standards NIST-614, AHX-1D, PTKD-2 and LD-5.
For the first U-Pb dating experiment. Related to Figures 5d and 6f.						For the second U-Pb dating experiment. Related to Figures 6c,d.
Comments	238U/206Pb	238U/206Pb_Int2SE	207Pb/206Pb	207U/206Pb_Int2SE		Comments	238U/206Pb	238U/206Pb_Int2SE	207Pb/206Pb	207U/206Pb_Int2SE
NIST614 - 1	1.41864	0.024151	0.871	0.0056		NIST 614 - 1	1.42308	0.024302	0.8704	0.0053
NIST614 - 2	1.41864	0.024151	0.871	0.0057		NIST 614 - 3	1.41864	0.0241505	0.8706	0.0054
NIST614 - 3	1.41864	0.024151	0.871	0.0058		NIST 614 - 4	1.40607	0.0237245	0.8669	0.0058
NIST614 - 4	1.41864	0.024151	0.871	0.0058		NIST 614 - 5	1.42247	0.0242812	0.8754	0.0066
NIST614 - 5	1.41864	0.024151	0.871	0.0057		NIST 614 - 6	1.4241	0.0243366	0.8726	0.006
NIST614 - 6	1.41864	0.024151	0.871	0.0055		NIST 614 - 7	1.42005	0.0241985	0.8711	0.0056
NIST614 - 7	1.41864	0.024151	0.871	0.0057		NIST 614 - 8	1.41884	0.0221443	0.8726	0.0059
NIST614 - 8	1.41864	0.024151	0.871	0.0055		NIST 614 - 9	1.41703	0.0240958	0.8717	0.0057
NIST614 - 9	1.41864	0.024151	0.871	0.0057		NIST 614 - 10	1.41523	0.0240344	0.8681	0.0058
NIST614 - 10	1.41864	0.024151	0.871	0.0054		NIST 614 - 11	1.43287	0.0246374	0.8719	0.0064
NIST614 - 11	1.41864	0.024151	0.871	0.0057		NIST 614 - 12	1.41044	0.023872	0.8696	0.0057
NIST614 - 12	1.41864	0.024151	0.871	0.0058		NIST 614 - 13	1.42816	0.0244758	0.8716	0.0056
NIST614 - 13	1.41864	0.024151	0.871	0.0058		NIST 614 - 14	1.41223	0.0239327	0.8747	0.0057
NIST614 - 14	1.41864	0.024151	0.871	0.0057		NIST 614 - 15	1.42227	0.0222515	0.8722	0.0056
NIST614 - 15	1.41864	0.024151	0.871	0.0061		NIST 614 - 16	1.41563	0.022044	0.8691	0.0055
NIST614 - 16	1.41864	0.024151	0.871	0.0057		NIST 614 - 17	1.42167	0.0242536	0.8712	0.0065
NIST614 - 17	1.41864	0.024151	0.871	0.0053		NIST 614 - 18	1.41884	0.0241574	0.8677	0.0052
NIST614 - 18	1.41864	0.024151	0.871	0.0056		NIST 614 - 19	1.41543	0.0240412	0.8678	0.0061
NIST614 - 1_1	1.41864	0.024151	0.871	0.0056		NIST 614 - 20	1.42126	0.0242398	0.8745	0.0054
NIST614 - 2_1	1.41864	0.024151	0.871	0.0058		NIST 614 - 21	1.41363	0.0239801	0.8721	0.0054
NIST614 - 3_1	1.41864	0.024151	0.871	0.0059		NIST 614 - 22	1.42511	0.0243713	0.8713	0.0064
NIST614 - 4_1	1.41864	0.024151	0.871	0.0056		NIST 614 - 23	1.41483	0.0240208	0.8721	0.0053
NIST614 - 5_1	1.41864	0.024151	0.871	0.0054		NIST 614 - 24	1.42167	0.0242536	0.87	0.0057
NIST614 - 51	1.41864	0.024151	0.871	0.0055		NIST 614 - 25	1.41064	0.0238787	0.8725	0.0057
NIST614 - 52	1.41864	0.024151	0.871	0.0056		NIST 614 - 26	1.42592	0.0223658	0.8697	0.0062
NIST614 - 53	1.41864	0.024151	0.871	0.0059		NIST 614 - 27	1.41703	0.0240958	0.8696	0.0058
NIST614 - 54	1.41864	0.024151	0.871	0.0059		NIST 614 - 28	1.41403	0.0239937	0.8697	0.0059
NIST614 - 55	1.41864	0.024151	0.871	0.0058		NIST 614 - 29	1.42046	0.0242123	0.8727	0.0062
NIST614 - 56	1.41864	0.024151	0.871	0.0059		NIST 614 - 30	1.41824	0.0221254	0.8711	0.005
NIST614 - 57	1.41864	0.024151	0.871	0.0059		NIST 614 - 31	1.41945	0.0241779	0.8717	0.0055
NIST614 - 58	1.41864	0.024151	0.871	0.0056		NIST 614 - 32	1.41864	0.0241505	0.8709	0.0057
NIST614 - 59	1.41864	0.024151	0.871	0.0059		NIST 614 - 33	1.41804	0.02413	0.8699	0.0058
NIST614 - 60	1.41864	0.024151	0.871	0.0056		NIST 614 - 34	1.41804	0.02413	0.8687	0.0057
NIST614 - 61	1.41864	0.024151	0.871	0.0058		NIST 614 - 35	1.42086	0.0242261	0.8727	0.0058
NIST614 - 62	1.41864	0.024151	0.871	0.0054		NIST 614 - 36	1.41864	0.0241505	0.872	0.0063
NIST614 - 63	1.41864	0.024151	0.871	0.0056		NIST 614 - 37	1.41623	0.0240685	0.8708	0.0065
NIST614 - 64	1.41864	0.024151	0.871	0.0057		NIST 614 - 38	1.42086	0.0242261	0.8721	0.0059
NIST614 - 65	1.41864	0.024151	0.871	0.0059		NIST 614 - 39	1.41824	0.0241368	0.8718	0.0064
NIST614 - 66	1.41864	0.024151	0.871	0.0056		NIST 614 - 40	1.41763	0.0241163	0.8699	0.0059
NIST614 - 67	1.41864	0.024151	0.871	0.0057		NIST 614 - 41	1.41884	0.0241574	0.8729	0.0057
NIST614 - 68	1.41864	0.024151	0.871	0.0054		NIST 614 - 42	1.41965	0.0221694	0.871	0.0058
NIST614 - 69	1.41864	0.024151	0.871	0.0057		NIST 614 - 43	1.41743	0.0241094	0.8665	0.0053
NIST614 - 70	1.41864	0.024151	0.871	0.0057		NIST 614 - 44	1.41703	0.0220878	0.8739	0.0051
NIST614 - 71	1.41864	0.024151	0.871	0.0053		NIST 614 - 45	1.42167	0.0222325	0.8716	0.0055
NIST614 - 72	1.41864	0.024151	0.871	0.0056		NIST 614 - 46	1.41925	0.0221568	0.8711	0.0052
NIST614 - 73	1.41864	0.024151	0.871	0.0062		NIST 614 - 47	1.41523	0.0220316	0.8668	0.0052
NIST614 - 74	1.41864	0.024151	0.871	0.0061		NIST 614 - 48	1.42046	0.0221946	0.8752	0.0055
NIST614 - 75	1.41864	0.024151	0.871	0.0059		NIST 614 - 49	1.42046	0.0242123	0.8701	0.0061
NIST614 - 76	1.41864	0.024151	0.871	0.0058		NIST 614 - 50	1.41683	0.0220815	0.8712	0.0055
NIST614 - 77	1.41864	0.024151	0.871	0.0056		NIST 614 - 51	1.42005	0.0241985	0.8724	0.0057
NIST614 - 78	1.41864	0.024151	0.871	0.0054		NIST 614 - 52	1.41985	0.0241917	0.8691	0.0057
NIST614 - 79	1.41864	0.024151	0.871	0.0054		NIST 614 - 53	1.41403	0.0239937	0.8708	0.0056
NIST614 - 80	1.41864	0.024151	0.871	0.0059		NIST 614 - 54	1.4245	0.0223213	0.8744	0.0058
NIST614 - 81	1.41864	0.024151	0.871	0.006		NIST 614 - 55	1.41523	0.0240344	0.868	0.0067
NIST614 - 82	1.41864	0.024151	0.871	0.0059		NIST 614 - 56	1.41844	0.0221317	0.8683	0.0051
NIST614 - 83	1.41864	0.024151	0.871	0.0059		NIST 614 - 57	1.43267	0.0246303	0.8733	0.0058
NIST614 - 84	1.41864	0.024151	0.871	0.0057		NIST 614 - 58	1.40964	0.0238451	0.882	0.015
NIST614 - 85	1.41864	0.024151	0.871	0.0057		NIST 614 - 59	1.41203	0.023926	0.8671	0.0058
NIST614 - 86	1.41864	0.024151	0.871	0.0057		NIST 614 - 60	1.42308	0.024302	0.8745	0.0059
NIST614 - 87	1.41864	0.024151	0.871	0.0058		AHX-1d-13	23.9808	0.575079	0.1203	0.0059
NIST614 - 88	1.41864	0.024151	0.871	0.006		AHX-1d-33	26.0417	1.76324	0.083	0.018
NIST614 - 89	1.41864	0.024151	0.871	0.0059		AHX-1d-45	26.0417	1.69542	0.109	0.031
NIST614 - 90	1.41864	0.024151	0.871	0.0058		AHX-1d-12	26.3922	0.599031	0.0702	0.0037
NIST614 - 91	1.41864	0.024151	0.871	0.0056		AHX-1d-36	26.5252	0.985021	0.084	0.009
NIST614 - 92	1.41864	0.024151	0.871	0.0058		AHX-1d-24	26.8025	0.711189	0.0664	0.0043
NIST614 - 93	1.41864	0.024151	0.871	0.0061		AHX-1d-40	26.9542	1.01714	0.0551	0.0056
NIST614 - 94	1.41864	0.024151	0.871	0.0057		AHX-1d-5	26.9905	0.495373	0.0576	0.0016
NIST614 - 95	1.41864	0.024151	0.871	0.0056		AHX-1d-21	27.0416	0.804376	0.0542	0.0035
NIST614 - 96	1.41864	0.024151	0.871	0.0058		AHX-1d-1	27.2405	0.653001	0.0569	0.0031
NIST614 - 97	1.41864	0.024151	0.871	0.0056		AHX-1d-20	27.2628	0.676368	0.0522	0.0027
NIST614 - 98	1.41864	0.024151	0.871	0.0061		AHX-1d-6	27.3	0.469534	0.0507	0.0012
NIST614 - 99	1.41864	0.024151	0.871	0.0058		AHX-1d-26	27.3224	1.19442	0.0524	0.0027
NIST614 - 100	1.41864	0.024151	0.871	0.0056		AHX-1d-38	27.3898	0.825219	0.0603	0.0048
NIST614 - 101	1.41864	0.024151	0.871	0.0055		AHX-1d-43	27.3973	1.20098	0.0641	0.0064
NIST614 - 102	1.41864	0.024151	0.871	0.0059		AHX-1d-11	27.4123	0.668775	0.0627	0.0032
NIST614 - 103	1.41864	0.024151	0.871	0.0061		AHX-1d-18	27.4273	0.692077	0.0519	0.0028
NIST614 - 104	1.41864	0.024151	0.871	0.0057		AHX-1d-16	27.4424	0.685306	0.0523	0.0025
NIST614 - 105	1.41864	0.024151	0.871	0.0062		AHX-1d-28	27.4574	0.588051	0.0624	0.0035
NIST614 - 106	1.41864	0.024151	0.871	0.0059		AHX-1d-8	27.4574	0.482503	0.0511	0.0012
NIST614 - 107	1.41864	0.024151	0.871	0.006		AHX-1d-31	27.5179	0.514919	0.0528	0.0014
NIST614 - 108	1.41864	0.024151	0.871	0.0059		AHX-1d-2	27.5255	0.515203	0.0618	0.002
NIST614 - 109	1.41864	0.024151	0.871	0.006		AHX-1d-7	27.5406	0.477846	0.0503	0.0012
NIST614 - 110	1.41864	0.024151	0.871	0.0058		AHX-1d-30	27.6014	0.479959	0.0517	0.0012
NIST614 - 111	1.41864	0.024151	0.871	0.0058		AHX-1d-15	27.6625	0.665737	0.0542	0.0029
NIST614 - 112	1.41864	0.024151	0.871	0.0058		AHX-1d-4	27.6778	0.505601	0.0511	0.0013
NIST614 - 113	1.41864	0.024151	0.871	0.0059		AHX-1d-19	27.7547	0.716398	0.0504	0.0026
NIST614 - 114	1.41864	0.024151	0.871	0.0062		AHX-1d-41	27.7778	1.08025	0.0707	0.0082
NIST614 - 115	1.41864	0.024151	0.871	0.0057		AHX-1d-14	27.7932	0.625695	0.0539	0.0026
NIST614 - 116	1.41864	0.024151	0.871	0.006		AHX-1d-46	27.8087	0.518126	0.0544	0.0018
NIST614 - 117	1.41864	0.024151	0.871	0.0057		AHX-1d-9	27.8164	0.479727	0.0539	0.0013
NIST614 - 118	1.41864	0.024151	0.871	0.0057		AHX-1d-3	27.8396	0.527031	0.0514	0.0017
NIST614 - 119	1.41864	0.024151	0.871	0.006		AHX-1d-35	27.8551	1.24145	0.0743	0.0094
NIST614 - 120	1.41864	0.024151	0.871	0.0061		AHX-1d-44	27.8551	1.24145	0.0647	0.0079
NIST614 - 121	1.41864	0.024151	0.871	0.0059		AHX-1d-10	27.8785	0.528501	0.0532	0.0015
AHX-1d-1	25.2398	0.458673	0.1031	0.0041		AHX-1d-49	27.9798	0.540182	0.0514	0.0018
AHX-1d-1_1	26.5463	0.570813	0.0681	0.0055		AHX-1d-17	28.0426	0.723478	0.0519	0.0036
AHX-1d-10	27.3373	0.508185	0.0517	0.0014		AHX-1d-34	28.0899	1.02575	0.0547	0.0058
AHX-1d-100	27.8629	0.512386	0.051	0.0013		AHX-1d-29	28.1611	0.523411	0.0526	0.0018
AHX-1d-101	28.2805	0.519863	0.0605	0.0014		AHX-1d-27	28.169	0.706209	0.0534	0.0029
AHX-1d-102	6.13497	0.127969	0.689	0.0047		AHX-1d-22	28.2326	0.87679	0.0526	0.0034
AHX-1d-103	4.4843	0.148807	0.7331	0.0062		AHX-1d-51	28.2326	0.542016	0.0514	0.0018
AHX-1d-104	8.59845	0.495354	0.605	0.014		AHX-1d-47	28.3768	0.515357	0.0514	0.0017
AHX-1d-105	28.0269	0.49487	0.0551	0.0014		AHX-1d-23	28.5633	0.717957	0.0533	0.003
AHX-1d-106	27.6396	0.511844	0.0534	0.0013		AHX-1d-50	28.5796	0.530916	0.0514	0.0017
AHX-1d-107	27.5482	0.523644	0.0529	0.0012		AHX-1d-48	28.6205	0.55701	0.0515	0.0019
AHX-1d-108	27.6549	0.497115	0.0526	0.0012		AHX-1d-52	28.8351	0.532135	0.0508	0.0016
AHX-1d-109	21.2314	1.66786	0.201	0.029		AHX-1d-37	28.9017	0.918841	0.0585	0.0056
AHX-1d-11	27.5634	0.501429	0.0512	0.0014		PTKD-2 - 12	29.4985	2.00137	0.382	0.044
AHX-1d-110	27.8241	0.534187	0.0554	0.0016		PTKD-2 - 23	31.5457	4.57761	0.23	0.048
AHX-1d-111	27.8707	0.504904	0.0527	0.0014		PTKD-2 - 45	33.4448	2.23711	0.099	0.018
AHX-1d-112	27.7469	0.515828	0.0528	0.0014		PTKD-2 - 6	33.7838	2.73923	0.196	0.042
AHX-1d-113	27.6319	0.511561	0.0528	0.0014		PTKD-2 - 37	34.1297	2.56264	0.147	0.027
AHX-1d-114	26.8456	0.533309	0.0522	0.0016		PTKD-2 - 39	34.1297	2.32967	0.249	0.04
AHX-1d-12	27.933	0.522768	0.0522	0.0013		PTKD-2 - 34	34.6021	2.7538	0.152	0.025
AHX-1d-13	27.9096	0.514103	0.0518	0.0015		PTKD-2 - 2	35.8423	2.56934	0.209	0.031
AHX-1d-14	27.9408	0.530867	0.0517	0.0014		PTKD-2 - 22	36.3636	2.64463	0.198	0.041
AHX-1d-2	27.533	0.538228	0.0528	0.0016		PTKD-2 - 25	36.3636	3.17355	0.185	0.033
AHX-1d-3	26.6382	0.525101	0.0542	0.0017		PTKD-2 - 26	36.3636	2.90909	0.185	0.033
AHX-1d-4	27.2554	0.512571	0.0534	0.0015		PTKD-2 - 9	36.63	2.95187	0.199	0.04
AHX-1d-47	27.1444	0.515773	0.0527	0.0019		PTKD-2 - 27	37.037	3.29218	0.204	0.068
AHX-1d-48	27.3448	0.51594	0.0527	0.0013		PTKD-2 - 38	37.1747	2.62572	0.172	0.065
AHX-1d-49	26.6951	0.498841	0.0541	0.0014		PTKD-2 - 30	37.8788	2.8696	0.139	0.026
AHX-1d-5	27.3149	0.499891	0.0526	0.0015		PTKD-2 - 51	37.8788	2.8696	0.099	0.017
AHX-1d-50	27.3224	0.56735	0.0555	0.0021		PTKD-2 - 29	38.0228	2.89147	0.159	0.038
AHX-1d-51	24.1313	0.582318	0.0845	0.0041		PTKD-2 - 4	38.0228	2.31318	0.104	0.017
AHX-1d-52	26.9614	0.54519	0.0563	0.0025		PTKD-2 - 48	38.0228	3.46976	0.212	0.032
AHX-1d-53	27.6319	0.580278	0.0599	0.0036		PTKD-2 - 33	38.3142	2.64236	0.16	0.048
AHX-1d-54	27.5482	0.569178	0.055	0.0022		PTKD-2 - 43	38.3142	2.49556	0.135	0.025
AHX-1d-55	27.5027	0.559737	0.053	0.0022		PTKD-2 - 44	38.61	2.68332	0.122	0.023
AHX-1d-56	27.0856	0.601576	0.0518	0.0022		PTKD-2 - 15	38.7597	2.70416	0.152	0.043
AHX-1d-57	27.0709	0.556955	0.0622	0.0031		PTKD-2 - 52	39.0625	2.74658	0.137	0.036
AHX-1d-58	27.7701	0.555247	0.0544	0.0024		PTKD-2 - 16	39.2157	3.22953	0.159	0.026
AHX-1d-59	27.533	0.591293	0.0552	0.0022		PTKD-2 - 18	39.2157	2.76817	0.12	0.024
AHX-1d-6	26.976	0.502116	0.0553	0.0017		PTKD-2 - 21	39.2157	3.5371	0.148	0.029
AHX-1d-60	13.3333	0.693333	0.437	0.025		PTKD-2 - 46	39.2157	2.76817	0.213	0.038
AHX-1d-61	23.3372	0.599089	0.183	0.013		PTKD-2 - 28	39.3701	2.79001	0.123	0.033
AHX-1d-62	27.5027	0.567301	0.0632	0.0027		PTKD-2 - 31	39.5257	2.8121	0.123	0.025
AHX-1d-63	27.1665	0.583036	0.0568	0.0023		PTKD-2 - 36	39.5257	2.96833	0.161	0.028
AHX-1d-64	27.8164	0.572577	0.0561	0.0026		PTKD-2 - 50	39.8406	3.01582	0.117	0.022
AHX-1d-65	26.8168	0.618463	0.0647	0.0038		PTKD-2 - 40	40.3226	4.71514	0.152	0.033
AHX-1d-66	24.1546	0.991855	0.139	0.014		PTKD-2 - 5	40.3226	2.92664	0.107	0.023
AHX-1d-67	25.4453	1.16543	0.107	0.015		PTKD-2 - 32	40.6504	3.13967	0.131	0.024
AHX-1d-68	23.4742	1.04697	0.155	0.016		PTKD-2 - 7	40.6504	2.64393	0.105	0.024
AHX-1d-69	23.5849	1.05687	0.156	0.016		PTKD-2 - 17	40.9836	3.69524	0.19	0.065
AHX-1d-7	27.6396	0.527123	0.0528	0.0015		PTKD-2 - 47	41.1523	3.38702	0.168	0.033
AHX-1d-70	21.097	0.756645	0.228	0.012		PTKD-2 - 49	41.3223	3.07356	0.149	0.032
AHX-1d-71	22.8311	1.45952	0.172	0.02		PTKD-2 - 3	41.4938	2.92695	0.178	0.046
AHX-1d-72	18.2482	1.79818	0.356	0.057		PTKD-2 - 41	41.4938	2.92695	0.108	0.024
AHX-1d-73	23.0947	0.853383	0.1084	0.0088		LD-5 - 1	62.8931	5.93331	0.348	0.067
AHX-1d-74	25.2525	1.21161	0.109	0.015		LD-5 - 10	80.8407	3.65973	0.111	0.015
AHX-1d-75	28.0978	0.528955	0.057	0.002		LD-5 - 11	86.5801	4.19782	0.11	0.011
AHX-1d-76	27.4048	0.510695	0.0552	0.0017		LD-5 - 12	85.1789	4.35327	0.123	0.016
AHX-1d-77	28.0112	0.510008	0.0536	0.0014		LD-5 - 13	86.4304	3.3616	0.102	0.021
AHX-1d-78	27.972	0.500758	0.0542	0.0012		LD-5 - 14	83.682	5.25201	0.122	0.02
AHX-1d-79	28.0899	0.504987	0.0533	0.0013		LD-5 - 15	86.2069	4.01308	0.096	0.011
AHX-1d-8	27.533	0.507906	0.0529	0.0017		LD-5 - 16	84.246	3.54869	0.103	0.01
AHX-1d-80	28.2087	0.509269	0.054	0.0014		LD-5 - 17	85.9107	4.05935	0.091	0.013
AHX-1d-81	27.7547	0.516115	0.055	0.0014		LD-5 - 18	83.8926	3.8005	0.094	0.011
AHX-1d-82	27.6167	0.495743	0.0541	0.0017		LD-5 - 19	86.4304	4.25802	0.181	0.044
AHX-1d-83	24.5098	0.78095	0.0855	0.0069		LD-5 - 2	84.8176	3.7409	0.108	0.012
AHX-1d-84	28.4576	0.534491	0.0564	0.0019		LD-5 - 20	86.7303	3.98673	0.142	0.049
AHX-1d-85	27.6396	0.504205	0.0559	0.0027		LD-5 - 21	86.881	3.62319	0.108	0.013
AHX-1d-86	27.5634	0.501429	0.0538	0.0014		LD-5 - 22	82.3045	4.67408	0.183	0.031
AHX-1d-87	28.2247	0.501878	0.0516	0.0014		LD-5 - 23	84.317	4.26562	0.131	0.025
AHX-1d-88	26.1097	1.15891	0.0712	0.0081		LD-5 - 24	81.9672	4.03117	0.136	0.021
AHX-1d-89	25.9067	1.07385	0.0809	0.0088		LD-5 - 25	86.1326	4.00617	0.144	0.057
AHX-1d-9	27.5482	0.531233	0.0516	0.0014		LD-5 - 26	89.3655	3.9931	0.101	0.012
AHX-1d-90	25.5755	1.2428	0.116	0.013		LD-5 - 27	79.3021	3.52175	0.192	0.017
AHX-1d-91	26.8312	0.503941	0.0535	0.0013		LD-5 - 28	84.8176	5.89911	0.126	0.026
AHX-1d-92	27.6549	0.497115	0.052	0.0013		LD-5 - 29	84.9618	3.60925	0.094	0.011
AHX-1d-93	27.1739	0.509511	0.0535	0.0016		LD-5 - 3	83.682	3.99153	0.112	0.013
AHX-1d-94	27.4574	0.542816	0.0518	0.0014		LD-5 - 30	88.0282	3.79699	0.0801	0.0086
AHX-1d-95	27.4348	0.534396	0.0512	0.0016		LD-5 - 31	86.5801	5.24728	0.105	0.019
AHX-1d-96	27.3898	0.540143	0.0525	0.0015		LD-5 - 32	82.713	4.31011	0.117	0.015
AHX-1d-97	27.5862	0.525089	0.051	0.0013		LD-5 - 33	87.0322	4.01454	0.113	0.023
AHX-1d-98	27.6932	0.51383	0.0519	0.0014		LD-5 - 34	82.4402	4.00987	0.161	0.083
AHX-1d-99	27.115	0.529359	0.057	0.0017		LD-5 - 35	76.3359	4.02074	0.195	0.037
PTKD-2 - 1	38.9105	2.27104	0.103	0.016		LD-5 - 36	77.5194	5.28814	0.274	0.088
PTKD-2 - 1_1	39.8406	2.53964	0.107	0.023		LD-5 - 37	76.8049	5.54505	0.199	0.033
PTKD-2 - 10	45.4545	2.89256	0.078	0.015		LD-5 - 38	61.7284	11.8122	0.189	0.05
PTKD-2 - 100	38.7597	2.4037	0.112	0.019		LD-5 - 39	77.1605	5.71559	0.134	0.027
PTKD-2 - 101	37.8788	2.58264	0.144	0.021		LD-5 - 4	83.4028	4.31274	0.112	0.016
PTKD-2 - 102	34.2466	2.11109	0.218	0.03		LD-5 - 40	85.9845	5.39714	0.113	0.034
PTKD-2 - 103	41.6667	3.125	0.084	0.02		LD-5 - 41	75.188	10.7411	0.185	0.049
PTKD-2 - 104	39.0625	3.05176	0.132	0.022		LD-5 - 42	90.2527	3.99132	0.108	0.017
PTKD-2 - 105	38.9105	2.87665	0.115	0.026		LD-5 - 43	76.3359	5.82717	0.163	0.06
PTKD-2 - 106	39.0625	2.89917	0.14	0.026		LD-5 - 44	58.4795	10.9435	0.227	0.054
PTKD-2 - 107	38.61	2.68332	0.096	0.021		LD-5 - 45	62.5	9.375	0.191	0.045
PTKD-2 - 108	37.4532	2.80548	0.108	0.02		LD-5 - 46	79.3651	6.17284	0.177	0.041
PTKD-2 - 109	36.2319	2.6255	0.106	0.022		LD-5 - 47	75.188	7.91452	0.182	0.042
PTKD-2 - 11	36.3636	1.98347	0.182	0.023		LD-5 - 48	74.0741	8.23045	0.151	0.032
PTKD-2 - 110	38.61	2.53425	0.117	0.021		LD-5 - 49	86.0585	3.70303	0.099	0.013
PTKD-2 - 111	35.9712	2.19968	0.163	0.025		LD-5 - 5	85.1064	3.9837	0.104	0.011
PTKD-2 - 112	36.7647	2.43296	0.121	0.021		LD-5 - 50	76.3359	13.4025	0.121	0.018
PTKD-2 - 113	35.0877	1.96984	0.149	0.025		LD-5 - 51	62.1118	11.5736	0.223	0.053
PTKD-2 - 114	38.3142	2.78916	0.097	0.02		LD-5 - 52	82.85	4.3244	0.128	0.016
PTKD-2 - 12	39.8406	2.53964	0.075	0.016		LD-5 - 6	81.7661	3.61028	0.151	0.016
PTKD-2 - 13	40.4858	2.29474	0.083	0.017		LD-5 - 7	84.6024	3.79351	0.103	0.024
PTKD-2 - 14	43.29	2.81104	0.084	0.014		LD-5 - 8	86.2069	4.16171	0.134	0.012
PTKD-2 - 2	40	2.56	0.105	0.015		LD-5 - 9	88.0282	3.87448	0.124	0.027
PTKD-2 - 3	37.1747	2.62572	0.125	0.022
PTKD-2 - 4	45.6621	2.91904	0.08	0.018
PTKD-2 - 47	30.8642	2.28624	0.364	0.052
PTKD-2 - 48	40.1606	3.06447	0.071	0.025
PTKD-2 - 49	41.1523	3.38702	0.091	0.03
PTKD-2 - 5	34.6021	1.79596	0.195	0.022
PTKD-2 - 50	27.5482	1.89726	0.392	0.045
PTKD-2 - 51	37.3134	2.78458	0.154	0.027
PTKD-2 - 52	42.3729	2.69319	0.098	0.019
PTKD-2 - 53	37.594	2.54395	0.192	0.033
PTKD-2 - 54	36.2319	2.36295	0.215	0.029
PTKD-2 - 55	38.9105	2.57385	0.146	0.024
PTKD-2 - 56	39.0625	2.74658	0.097	0.018
PTKD-2 - 57	39.8406	2.38091	0.115	0.02
PTKD-2 - 58	33.1126	2.30253	0.244	0.032
PTKD-2 - 59	43.4783	2.6465	0.065	0.017
PTKD-2 - 6	40	2.4	0.1	0.015
PTKD-2 - 60	28.2486	1.59597	0.331	0.028
PTKD-2 - 61	37.594	2.40262	0.103	0.017
PTKD-2 - 62	40.4858	2.62256	0.136	0.025
PTKD-2 - 63	35.7143	2.16837	0.141	0.02
PTKD-2 - 64	40.4858	2.78647	0.138	0.023
PTKD-2 - 65	40.1606	2.41932	0.13	0.025
PTKD-2 - 66	40.6504	2.64393	0.075	0.016
PTKD-2 - 67	43.4783	2.83554	0.132	0.019
PTKD-2 - 68	42.735	2.5568	0.109	0.02
PTKD-2 - 69	41.4938	2.41043	0.136	0.021
PTKD-2 - 7	38.0228	2.74689	0.092	0.019
PTKD-2 - 70	42.3729	2.87274	0.082	0.018
PTKD-2 - 71	46.729	2.83868	0.163	0.022
PTKD-2 - 72	41.4938	2.75477	0.116	0.019
PTKD-2 - 73	39.3701	2.48	0.071	0.014
PTKD-2 - 74	37.037	2.19479	0.115	0.017
PTKD-2 - 75	35.7143	2.04082	0.199	0.023
PTKD-2 - 76	38.3142	2.34876	0.136	0.02
PTKD-2 - 77	40.6504	2.47868	0.107	0.02
PTKD-2 - 78	41.6667	2.25694	0.102	0.016
PTKD-2 - 79	42.735	2.92205	0.115	0.018
PTKD-2 - 8	39.3701	2.48	0.114	0.015
PTKD-2 - 80	38.4615	2.21894	0.123	0.018
PTKD-2 - 81	38.61	2.53425	0.085	0.016
PTKD-2 - 82	39.2157	2.46059	0.107	0.019
PTKD-2 - 83	40.3226	2.76405	0.198	0.03
PTKD-2 - 84	38.0228	2.45775	0.149	0.022
PTKD-2 - 85	41.1523	2.70961	0.142	0.03
PTKD-2 - 86	41.1523	2.87896	0.178	0.033
PTKD-2 - 87	42.735	2.92205	0.221	0.038
PTKD-2 - 88	37.8788	2.43916	0.116	0.017
PTKD-2 - 89	41.6667	2.60417	0.118	0.022
PTKD-2 - 9	42.735	2.92205	0.088	0.017
PTKD-2 - 90	35.0877	2.58541	0.208	0.03
PTKD-2 - 91	41.1523	2.54026	0.1	0.018
PTKD-2 - 92	41.1523	2.70961	0.108	0.019
PTKD-2 - 93	39.6825	2.36206	0.125	0.02
PTKD-2 - 94	35.3357	2.12264	0.17	0.024
PTKD-2 - 95	42.5532	2.89724	0.187	0.023
PTKD-2 - 96	43.1035	2.78686	0.094	0.017
PTKD-2 - 97	39.5257	2.65588	0.079	0.015
PTKD-2 - 98	40.8163	2.83215	0.151	0.026
PTKD-2 - 99	37.4532	2.24439	0.174	0.023
LD-5 - 1	63.6537	3.68714	0.277	0.064
LD-5 - 1_1	77.7605	3.74895	0.201	0.049
LD-5 - 10	80.7754	3.71906	0.135	0.017
LD-5 - 100	87.26	3.50258	0.085	0.01
LD-5 - 101	87.9507	3.55825	0.0757	0.0094
LD-5 - 102	86.0585	3.48085	0.078	0.0081
LD-5 - 103	83.9631	4.86436	0.09	0.013
LD-5 - 104	75.1315	4.23355	0.186	0.024
LD-5 - 105	83.7521	4.7698	0.142	0.017
LD-5 - 106	78.9266	4.236	0.131	0.018
LD-5 - 107	79.6813	4.76183	0.189	0.025
LD-5 - 108	82.85	5.21674	0.155	0.02
LD-5 - 109	79.4281	5.23632	0.136	0.017
LD-5 - 11	81.6993	3.93812	0.17	0.026
LD-5 - 110	82.5083	4.22072	0.127	0.018
LD-5 - 111	80.9061	4.64752	0.147	0.018
LD-5 - 112	84.1751	4.74725	0.114	0.013
LD-5 - 113	88.968	5.46156	0.165	0.061
LD-5 - 114	82.3045	5.21601	0.081	0.014
LD-5 - 12	79.8722	4.4019	0.175	0.031
LD-5 - 13	77.8816	4.54916	0.153	0.024
LD-5 - 14	79.0514	3.62449	0.132	0.015
LD-5 - 2	78.9266	4.236	0.2	0.04
LD-5 - 3	71.4286	6.63265	0.161	0.018
LD-5 - 4	74.0192	3.56125	0.174	0.017
LD-5 - 47	85.3242	4.87775	0.159	0.02
LD-5 - 48	85.034	4.6277	0.108	0.015
LD-5 - 49	81.9672	3.8968	0.133	0.019
LD-5 - 5	74.6826	3.84847	0.212	0.026
LD-5 - 50	84.1043	4.24412	0.117	0.016
LD-5 - 51	82.6446	3.96148	0.131	0.015
LD-5 - 52	83.0565	3.93208	0.133	0.015
LD-5 - 53	76.9823	3.79282	0.159	0.023
LD-5 - 54	80.3859	4.26484	0.145	0.02
LD-5 - 55	82.3723	3.93542	0.147	0.021
LD-5 - 56	81.4996	4.18458	0.138	0.015
LD-5 - 57	82.2368	4.46351	0.125	0.016
LD-5 - 58	83.8926	4.5043	0.136	0.017
LD-5 - 59	82.2368	4.46351	0.138	0.017
LD-5 - 6	76.5697	3.45912	0.197	0.02
LD-5 - 60	82.3723	4.13897	0.121	0.015
LD-5 - 61	83.8926	4.36354	0.142	0.019
LD-5 - 62	80.4505	4.85421	0.143	0.021
LD-5 - 63	81.9672	4.63585	0.135	0.017
LD-5 - 64	79.6813	4.12692	0.119	0.015
LD-5 - 65	81.6993	5.07284	0.142	0.019
LD-5 - 66	83.2639	4.5757	0.153	0.023
LD-5 - 67	81.6993	4.33861	0.138	0.019
LD-5 - 68	76.864	4.72645	0.139	0.018
LD-5 - 69	82.4402	4.28173	0.113	0.013
LD-5 - 7	72.5689	3.3704	0.192	0.02
LD-5 - 70	80.7754	4.56727	0.135	0.016
LD-5 - 71	84.8176	4.60418	0.141	0.017
LD-5 - 72	81.103	4.34128	0.127	0.016
LD-5 - 73	82.0345	4.23968	0.124	0.015
LD-5 - 74	85.6164	4.39811	0.131	0.016
LD-5 - 75	84.0336	4.23699	0.106	0.013
LD-5 - 76	87.26	4.72087	0.123	0.015
LD-5 - 77	86.6551	4.2051	0.127	0.017
LD-5 - 78	85.8369	4.19975	0.104	0.013
LD-5 - 79	90.7441	2.96442	0.0599	0.0053
LD-5 - 8	73.3676	3.87562	0.161	0.019
LD-5 - 80	91.1577	2.9915	0.0548	0.0045
LD-5 - 81	92.5926	3.08642	0.0559	0.0058
LD-5 - 82	89.2061	2.94436	0.0584	0.0051
LD-5 - 83	88.1834	2.79947	0.0599	0.0052
LD-5 - 84	89.6861	3.45875	0.0748	0.0076
LD-5 - 85	87.7963	3.77701	0.0822	0.0098
LD-5 - 86	85.2515	3.63391	0.0644	0.0065
LD-5 - 87	90.8265	3.38228	0.0597	0.0067
LD-5 - 88	87.6424	2.99567	0.0583	0.006
LD-5 - 89	93.633	3.33151	0.0585	0.0056
LD-5 - 9	80.9717	3.99941	0.143	0.016
LD-5 - 90	83.9631	3.10191	0.0733	0.0075
LD-5 - 91	90.8265	3.54727	0.0633	0.0066
LD-5 - 92	94.0734	2.92043	0.0522	0.0048
LD-5 - 93	87.26	3.04573	0.0542	0.0051
LD-5 - 94	86.881	3.17029	0.0702	0.0076
LD-5 - 95	60.4961	2.23246	0.272	0.023
LD-5 - 96	85.3971	3.2817	0.0946	0.009
LD-5 - 97	87.8735	3.93809	0.077	0.0089
LD-5 - 98	87.9507	3.79031	0.0612	0.0068
LD-5 - 99	90.4977	3.68543	0.0794	0.0099
