# Supplementary material
Source: MDPI journal article supplement (https://www.mdpi.com/2075-163X/12/7/899)

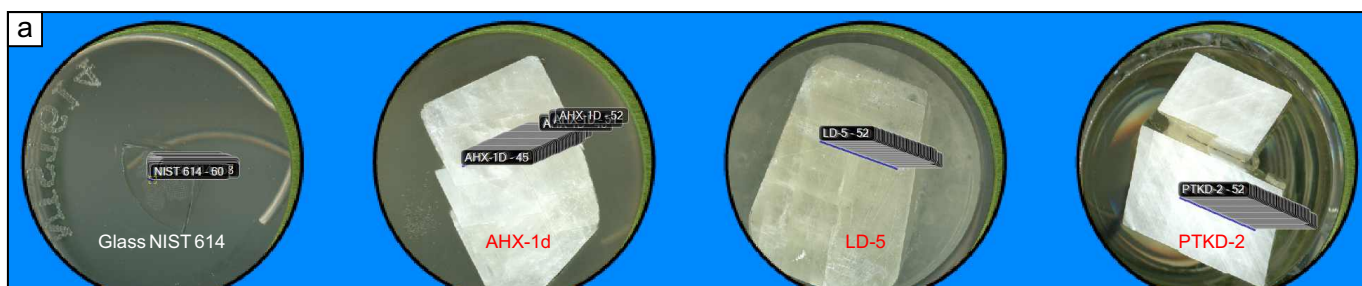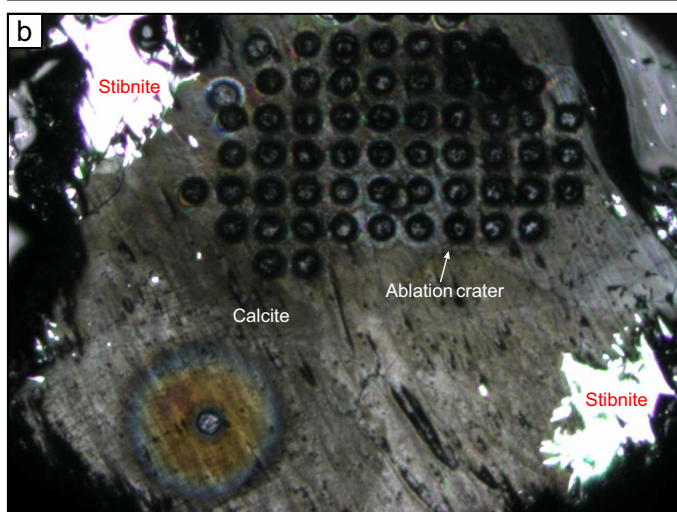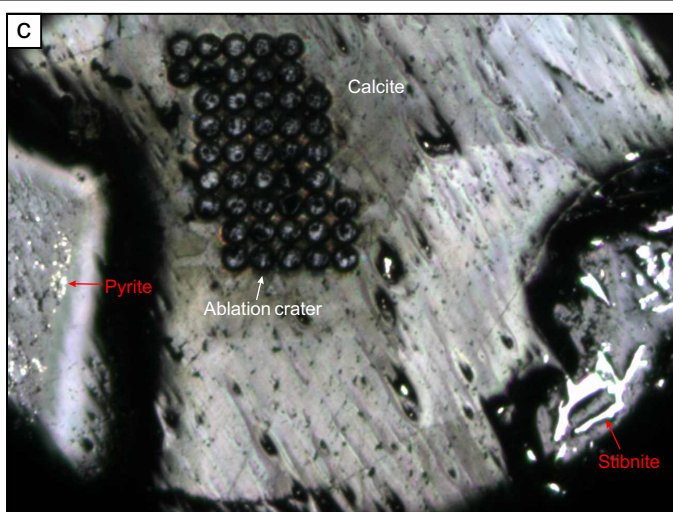

Supplement: s1 [file s1 › Supplementary Figure S1.pdf]

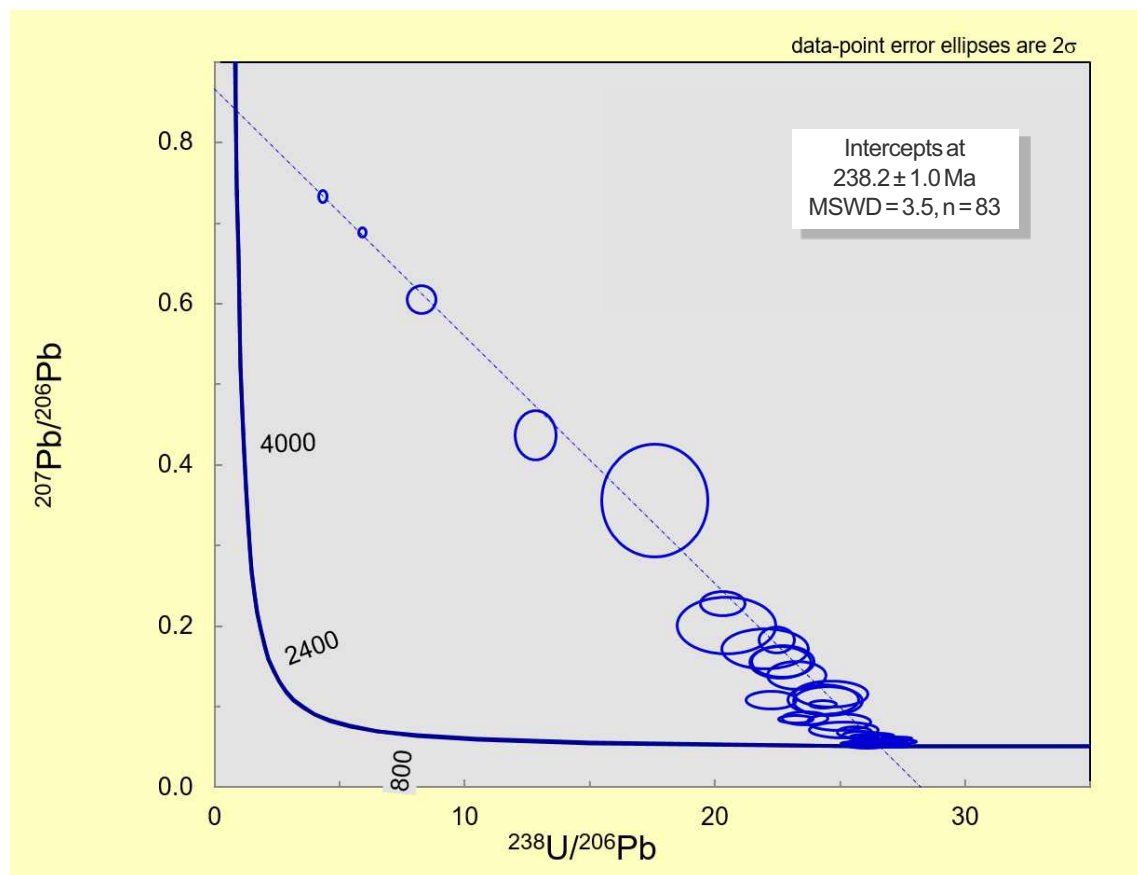

Supplement: s1 [file s1 › Supplementary Figure S2.pdf]

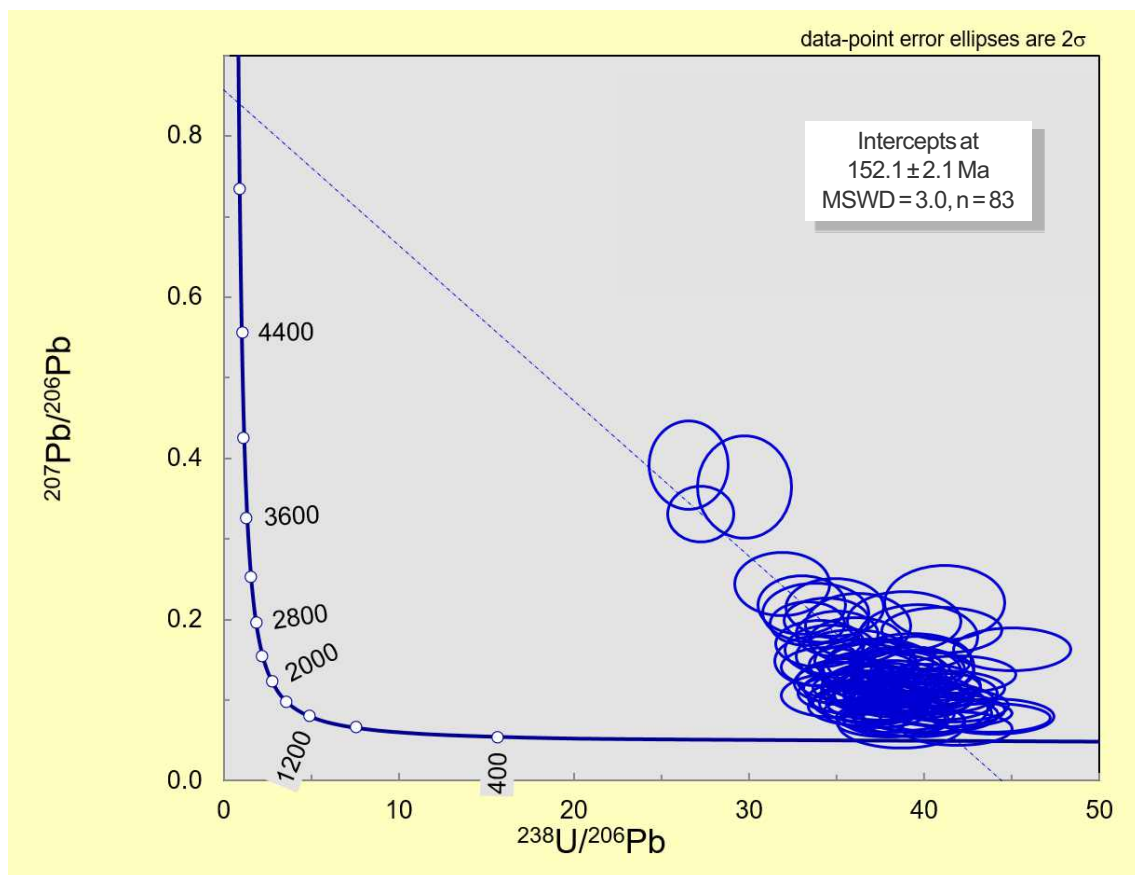

Supplement: s1 [file s1 › Supplementary Figure S3.pdf]

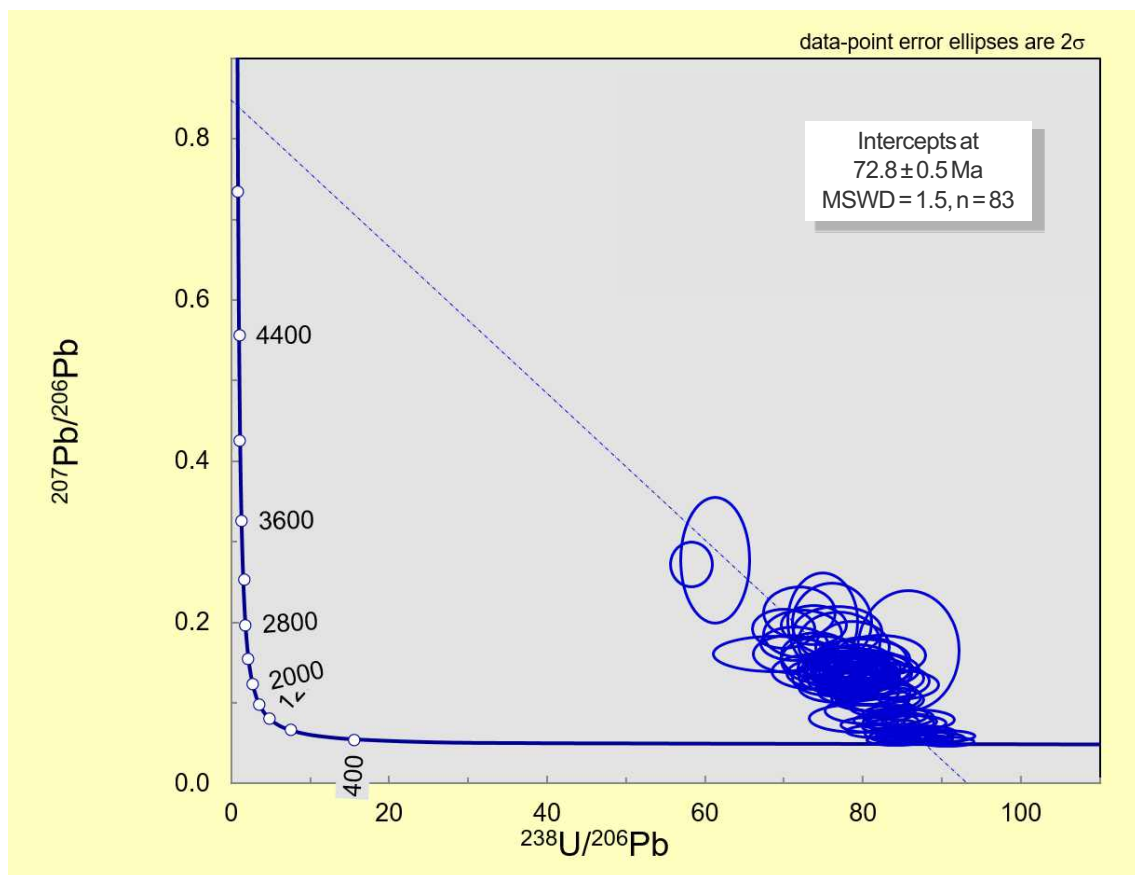

Supplement: s1 [file s1 › Supplementary Figure S4.pdf]

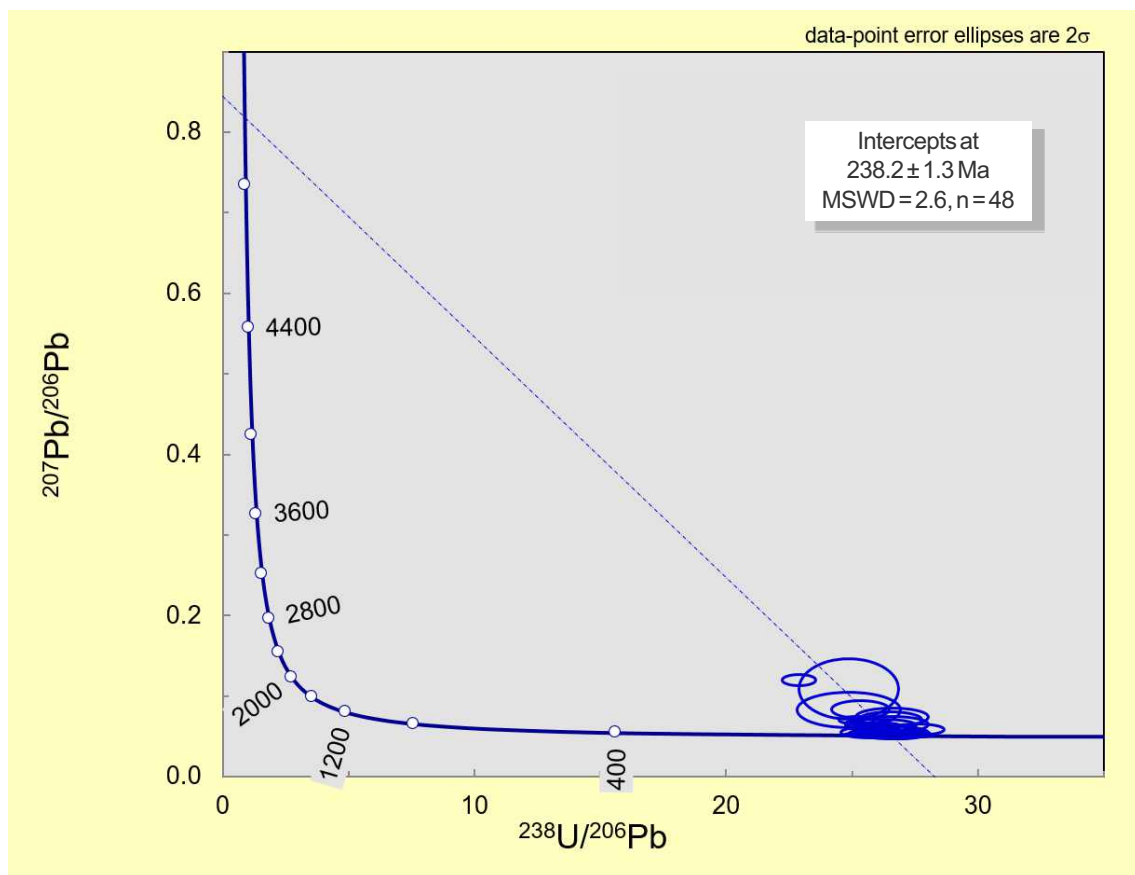

Supplement: s1 [file s1 › Supplementary Figure S5.pdf]

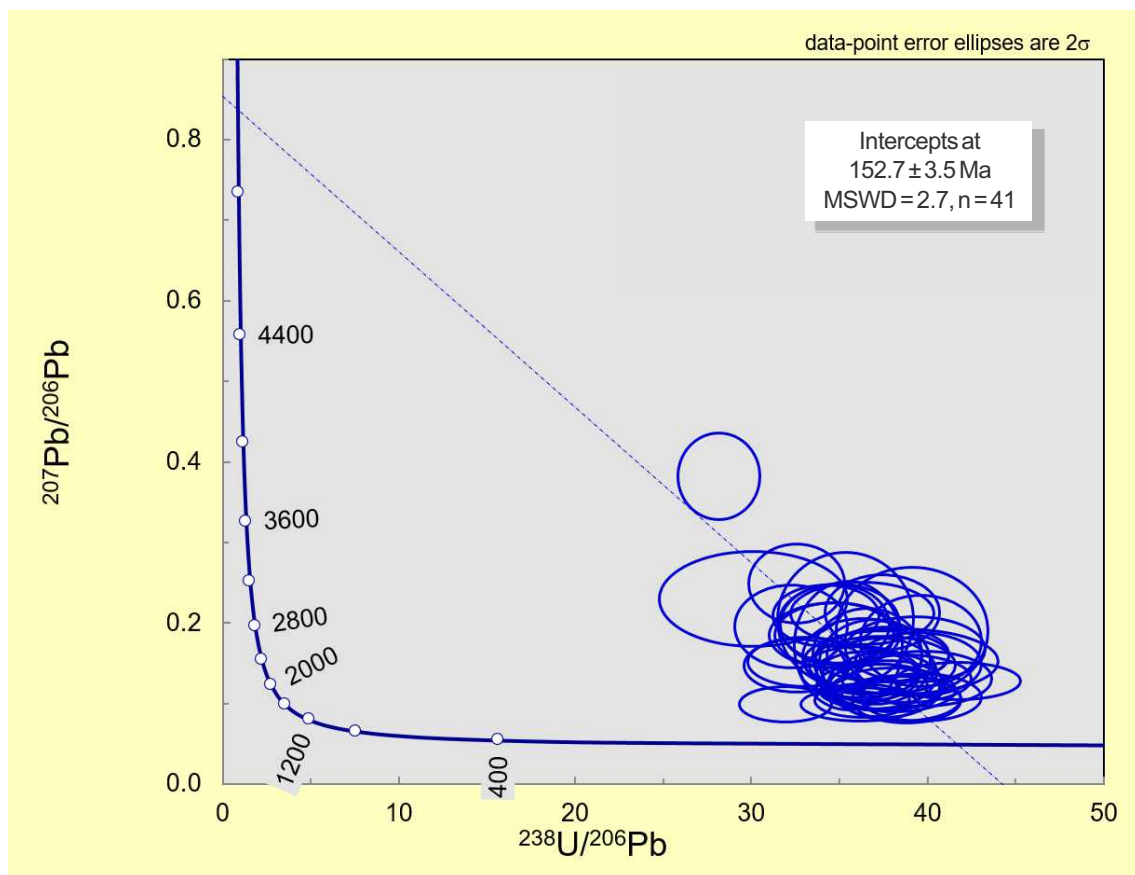

Supplement: s1 [file s1 › Supplementary Figure S6.pdf]

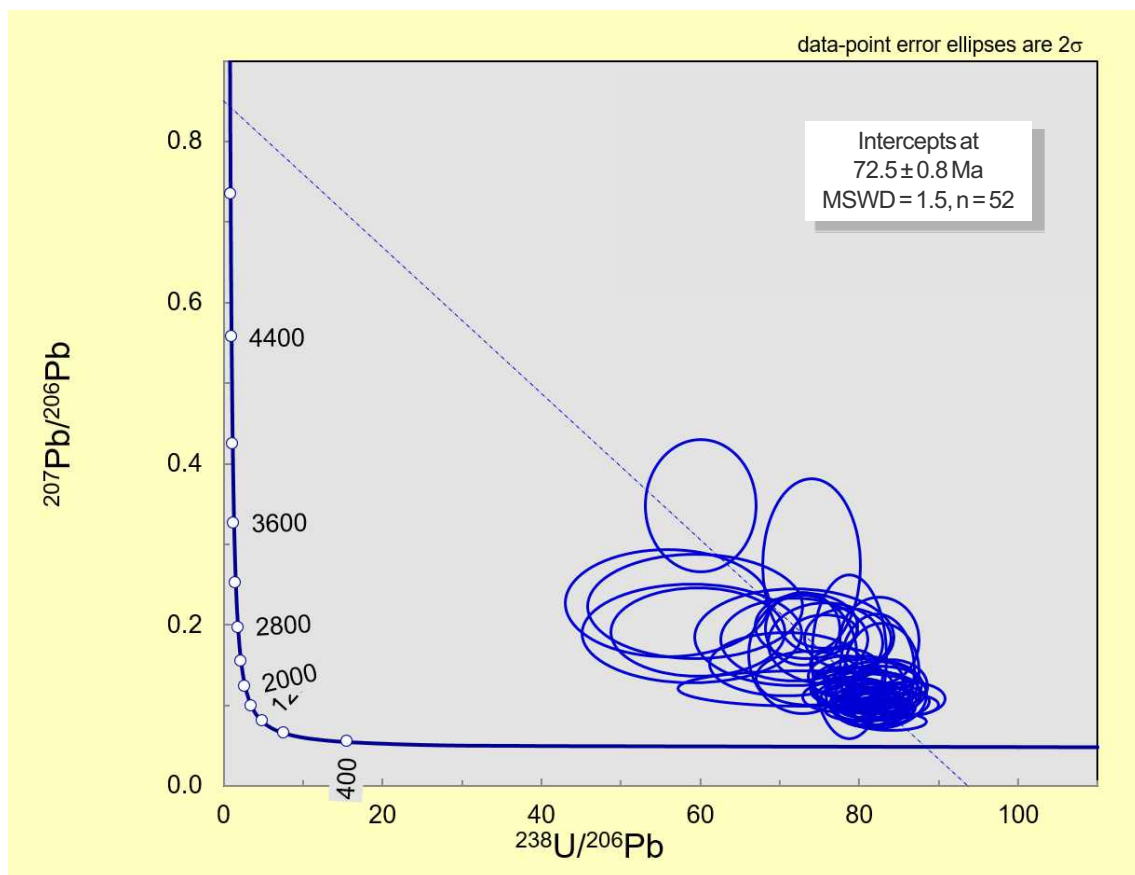

Supplement: s1 [file s1 › Supplementary Figure S7.pdf]
